# Supplementary material for: Single-cell ATAC and RNA sequencing reveal pre-existing and persistent subpopulations of cells associated with relapse of prostate cancer
Source: Research Square preprint supplement (doi:10.21203/rs.3.rs-384422/v1), 2021-04-12
Supplement: Supplementary file 1 [file f7b446b2915725698bf5c9cb.xlsx]

## Sheet: Gene signatures
Table S3. Signature gene sets derived and used in the study. Signatures are grouped by 1) individual single-cell cluster marker gene sets, which are genes that define each single-cell RNA sequencing cluster from LNCaP; 2) combined cluster marker gene sets, which are the individual single-cell cluster marker gene sets grouped by cluster type (either initial, ENZ-induced, or persistent); and 3) gen…
Single scRNA-seq cluster marker genes													Combined cluster markers			Pathways and processes
Cluster 0	Cluster 1	Cluster 2	Cluster 3	Cluster 4	Cluster 5	Cluster 6	Cluster 7	Cluster 8	Cluster 9	Cluster 10	Cluster 11	Cluster 12	Initial clusters	ENZ-induced clusters	Persistent clusters	Stem-Like	mTORC1 signaling	NEPC upregulated	NEPC downregulated	MYC targets V1	MYC targets V2	PROSGenesis	AR activity	AR full length (ARFL)	AR variant (ARV)	BRCAness
HNRNPA2B1	BNIP3	RPL7	CAMK2N1	PEG3	PTTG1	RPS3A	EPHX1	FAM111B	HIST1H4C	MT1G	CENPF	LDHA	PEG3	RPL7	HNRNPA2B1	CDC20	CALR	AP3B2	AR	PCNA	SLC19A1	SBSPON	ABCC4	ADAM9	ANKRD32	CHEK1
NMU	PGK1	SESN3	LMO4	RPL34	CCNB1	RPL7A	ATP2B1	PCNA	TUBA1B	GULP1	UBE2C	PGK1	RPL34	SESN3	NMU	MKI67	PGK1	TUBB2B	AIM1	PSMD8	MRTO4	ELF3	ACSL3	SLC50A1	ANO6	BRCA1
ARL6IP1	LDHA	EIF1B	HSPA5	H2AFJ	UBE2S	RPS28	SQSTM1	MCM3	CDK1	S100P	TOP2A	BNIP3	H2AFJ	EIF1B	ARL6IP1	CCNB2	PSAT1	CRMP1	ADRB2	PSMD7	TMEM97	ATP1B1	ADAM7	RAB4A	ASPM	EXO1
PTTG1	MT2A	MARCKSL1	SPON2	SLC22A3	CENPF	RPS24	CHPT1	MCM7	HIST2H2AC	AC069228.1	KPNA2	ENO1	SLC22A3	MARCKSL1	PTTG1	CENPF	LDHA	PCSK1	SPDEF	SET	RRP9	TSTD1	C1ORF116	PHF8	ATL2	BLM
RPA3	ENO1	IGFBP5	LTN1	SNHG8	CKS2	RPL41	ASPH	MCM4	ATAD2	CHCHD10	CCNB1	MT2A	SNHG8	IGFBP5	RPA3	DLGAP5	SCD	SEZ6	STEAP1	SNRPA1	PES1	LRRC26	CENPN	PARVA	CA8	RMI1
HNRNPC	BNIP3L	VIM	AIDA	MALAT1	HMMR	H2AFJ	NQO1	BRCA1	HIST1H1B	BLVRB	CKS2	PTTG1	MALAT1	VIM	HNRNPC	HMMR	P4HA1	CDC25B	STEAP2	RAN	TFB2M	APIP	EAF2	NRARP	CDK1	RAD54L
SRSF3	GPI	SOX4	CALR	RPS13	CDKN3	NETO1	ATF4	ORC6	TYMS	SYT4	HMMR	TPI1	RPS13	SOX4	SRSF3	PLK1	NUPR1	KCNC1	C1orf116	SRSF2	EXOSC5	ID1	ELL2	NFIX	CEP128	RAD51
CENPW	NEAT1	TMSB10	MT-CO3	ADGRG6	TUBA1B	GULP1	SELENBP1	CLSPN	UBE2T	REXO2	HMGB2	GPI	ADGRG6	TMSB10	CENPW	CCNB1	HSPA5	TMEM145	ERGIC1	G3BP1	IPO4	ATP6AP2	FKBP5	MYO1B	CHAC2	LIG1
HNRNPM	NDRG1	RDH10	MT-ND1	LIMCH1	CDC20	SLC4A4	HSPD1	GINS2	HIST1H1E	RNF187	TUBB4B	BNIP3L	LIMCH1	RDH10	HNRNPM	PTTG1	ACLY	CCDC88A	LATS2	STARD7	NDUFAF4	BEX4	GNMT	MMP20	CPS1	XRCC3
STMN1	SCD	FTL	MT-CO1	NCAM2	TUBB4B	RPLP2	PAGE1	CDC6	TOP2A	FTH1	CDC20	ARL6IP1	NCAM2	FTL	STMN1	CENPE	SQSTM	ASCL1	NKX3-1	NPM1	NOC4L	BEX1	HERC3	LRIG3	CROT	RMI2
HMGN1	C4orf3	GNAI1	SEC61B	PRAC1	ARL6IP1	RPS13	PCK2	E2F1	HMGB2	NQO1	NUSAP1	PKM	PRAC1	GNAI1	HMGN1	UBE2S	GOT1	ENO2	PMEPA1	BUB3	MYC	MECOM	KLK2	KLF5	DIAPH3
HMGN2	FAM162A	ATXN7L3B	VAV3	NEAT1	BIRC5	FOLH1	HSPA8	MCM5	TUBB	RBCK1	UBE2S	GAPDH	NEAT1	ATXN7L3B	HMGN2	NCAPD2	TPI1	MIAT	HOMER2	EIF3D	SRM	MME	KLK3	KCNJ1	DSCAM
DYNLL1	PKM	PITX1	HSP90B1	BTG1	DYNLL1	RPS25	APRT	MCM10	NUSAP1	H2AFJ	CENPE	DSP	BTG1	PITX1	DYNLL1	TUBA1C	AURKA	SRRM4	ZBTB16	XPO1	PA2G4	TRIM2	MAF	GLI3	DTL
NQO1	P4HA1	UGT2B15	PLA2G2A	RPS25	HMGB2	RPL23A	RNF187	HELLS	PCLAF	FBXL17	CDK1	C4orf3	RPS25	UGT2B15	NQO1	DYNLL1	DHFR	NPTX1	ZG16B	FBL	GNL3	PAQR6	MED28	G3BP2	E2F7
EPHX1	GAPDH	TUBA1A	AR	SAT1	CCNB2	STEAP2	LDHB	SLBP	CENPU	PKIB	ASPM	PTMS	SAT1	TUBA1A	EPHX1	CD81	IGFBP5	PHF19	EPHX2	EIF4A1	NOLC1	RAB25	MPHOSPH9	FAM96B	ENDOG
ASPH	DSP	IGFBP2	SEC11C	FOLH1	TUBA1C	COLCA1	ATP5F1B	DTL	MKI67	MALAT1	TPX2	NDRG1	FOLH1	IGFBP2	ASPH	CKAP5	ENO1	RNF183	SLC45A3	CANX	WDR43	S100A1	NKX3–1	ERN1	GCNT1
PAGE1	MALAT1	SNHG8	MID1	RPLP2	STMN1	RPS3	ATG3	CDT1	PCNA	COX7A2	PTTG1	SEC61G	RPLP2	SNHG8	PAGE1	ODC1	EBP	TOX	GLUD1	NAP1L1	RABEPK	S100A14	NNMT	CUZD1	GJA1
	TPI1	CITED2	TOX3	MAOA	CENPE	BTG1	GARS	MCM6	CENPF	SARS	DLGAP5	STMN1	MAOA	CITED2	BNIP3		AK4	INSM1	SLC44A4	CBX3	NOP16	S100A11	PMEPA1	CLDN8	GMPR
	PFKP	PAGE1	WNT5A	TMEM205	DEPDC1	LUZP2	EPRS	DNMT1	DEK	FXYD3	CDKN3	SCD	TMEM205	PAGE1	PGK1		ME1	IGFBPL1	CCND1	CCT3	TBRG4	TXNIP	PTGER4	CDK2AP2	GRIN3A
	PGAM1	UGT2B11	BROX	RPS3	H2AFZ	RPL4	C2orf54	ATAD2	DHFR	PRDX5	MKI67	UBE2S	RPS3	UGT2B11	LDHA		ALDOA	ELAVL3	KLK3	C1QBP	DDX18	SLC39A8	ZBTB10	KNSTRN	IL1R2
	ALDOC	ASPH	MRPL41	ZFAS1	DLGAP5	RLN1	FTH1	FEN1	STMN1	STEAP2	CCNB2	CENPF	ZFAS1	ASPH	MT2A		CCNG1	RUNDC3A	PPAP2A	U2AF1	NIP7	LMO4		TIGD6	INMT
	MIR210HG	SEMA3C	ANKRD29	PURA	CENPW	STEAP1	GPX4	CDCA7	H2AFX	ME1	AURKA	PGAM1	PURA	SEMA3C	ENO1		RRM2	NKX2-1	GRTP1	UBE2L3	WDR74	NANS		GPR65	INMT-FAM188B
	MT1X	ABRACL	MANF	PPP3CA	TOP2A	NAP1L1	MGST1	RFC2	DUT	AIG1	TUBA1C	FAM162A	PPP3CA	ABRACL	BNIP3L		DHCR24	UNC13A	YAP1	SSBP1	BYSL	PTGR1		GALNT18	INSC
	PIAS2	NR2F1	LRRN1	STEAP2	PBK	LRBA	TARS	UNG	FAM111B	EIF1	SMC4	NMU	STEAP2	NR2F1	GPI		PSMC4	FANCL	SYNGR2	SRSF1	HSPD1	PDZK1IP1		FOXD4	INSIG1
	CKB	HSPA8	CHCHD2	NUPR1	NUSAP1	PRAC1	DBI	CHAF1A	TMPO	CLDN7	PLK1	P4HA1	NUPR1	HSPA8	NEAT1		MCM2	SH3GL2	ALDH6A1	TCP1	PLK4	TSPAN1		ELP5	ISL1
	ACLY	CBLN2	ADRA2A	TMED3	CKS1B	LIMCH1	UGT2B11	CDK1	SMC4	PHGDH	CKS1B	ABHD2	TMED3	CBLN2	NDRG1		PGM1	FAM161A	NAP1L2	MCM2	NOP2	CITED4		DNM1L	KBTBD8
	ABHD2	LGALS1	NOP10	EIF4A2	TPX2	MME	ARL1	CENPU	UBE2C	CPNE3	BIRC5	MKNK2	EIF4A2	LGALS1	SCD		PLK1	APLP1	HPN	EIF3B	PPAN	CASZ1		ABCA1	KCNC4
	PLOD2	CHPT1	FAM198B	BLOC1S6	MAD2L1	SLC22A3	KLHL35	BRCA2	TPX2	GHITM	FAM83D	PIAS2	BLOC1S6	CHPT1	C4orf3		GSK3B	DLL3	RGS10	PSMD14	NOP56	CDK6		CKB	KCNMB2
	CCNI	GSTA1	CREB3L4	GDF15	ECT2	NUCB2	DDIT3	DHFR	CKS1B	LINC01133	CDCA3	PTMA	GDF15	GSTA1	FAM162A		SDF2L1	DNMT1	RILPL2	SNRPA	RCL1	HOPX		CEACAM16	KRT19
	SEC61G	ST3GAL1	MAT2A	TXNRD1	SMC4	CFAP69	BEX2	XRCC2	TK1	NARS	SGO2	FADS2	TXNRD1	ST3GAL1	PKM		MCM4	ELAVL4	ACPP	PWP1	NPM1	ANXA3		CAB39L	LPL
	TXNIP	DDC	NIPSNAP3A	STEAP1	NEK2	TMEM205	PPP1R16A	RFC4	BRCA1	GDF15	GTSE1	AMD1	STEAP1	DDC	P4HA1		HSP90B1	FGF9	HOXB13	APEX1	AIMP2	CLDN3		PXYLP1	LRFN2
	AK4	ATP2B1	CRELD2	SNHG19	RAD21	ETV1	CSTB	RMI2	PBK	MAP1LC3B	CKAP2	MT1X	SNHG19	ATP2B1	GAPDH		TUBG1	INA	ICAM3	TXNL4A	RRP12	TSPAN33		ABCA5	MAD2L1
	INSIG2	CD24	TSPAN8	DEGS1	JPT1	NCAM2	SDSL	NASP	SMC2	TRIB3	DBF4	HMGB1	DEGS1	CD24	DSP		PDAP1	NPPA		HNRNPR	PPRC1	TACSTD2		AGAP9	MAF
	VEGFA	MDK	H3F3A	NFIB	HMGB1	ZFAS1	UGT2B15	UBE2T	DNMT1	NEAT1	CDCA2	CDKN3	NFIB	MDK	MALAT1		BUB1	PCSK2		PSMB2	TCOF1	IL17RE			MESP1
	KLK4	LDHB	PDIA6	FTH1	ANP32E	IFITM3	ADD3	CHEK1	ESCO2	TMED10	ARL6IP1	HNRNPA2B1	FTH1	LDHB	TPI1		GPI	SNAP25		HPRT1	MCM5	CD9			MESP2
	KLK2	SELENBP1	ANK3	VTA1	CALM2	PLGRKT	ASS1	FIGNL1	RAD51C	MMP16	NDC80	HNRNPH3	VTA1	SELENBP1	PFKP		ATP2A2	SOX2		MCM6	HK2	CMAS			MID1
	TFF3	TMSB4X	PDIA3	NUP93	NUCKS1	MESP1	ASNS	TK1	RRM1	ZYX	NUF2	NUCKS1	NUP93	TMSB4X	PGAM1		HMBS	STMN1		NME1	CBX3	CEACAM1			NCAPG2
	EGFR	ADD3	ARPC5	NEDD4L	MKI67	GTF2H2	SNHG25	CDC45	TUBG1	PLA2G16	NEK2	HMGN2	NEDD4L	ADD3	ALDOC			MYCN		SNRPD1	PLK1	SPINT2			NDST4
	DARS	CKB	GTF3C6	BDP1	CDCA3	SLC30A4	CKB	MAD2L1	RANBP1	ADGRG6	BUB3	EHF	BDP1	CKB	MIR210HG			AURKA		EEF1B2	PHB	UPK1A			NUF2
	MKNK2		S100A11	GRB10	KIF4A	MALAT1	TMSB4X	PGP	TMEM106C	DDIT3	KIF20B	ANP32E	GRB10	CAMK2N1	MT1X			TUBB3		HSPD1	MCM4	FXYD3			NUP93
	PDK1		HSP90AB1	HIST3H2A	HMGN2	METRN	GNAI1	ASF1B	MCM7	SCCPDH	CENPA	KIAA2013	HIST3H2A	LMO4	PIAS2			EZH2		CAD	CDK4	AKAP13			PARL
	ZKSCAN1		PRUNE2	SLC7A11	NUF2	KLK3	TM7SF2	DUT	CENPM	CLGN	HJURP	PLOD1	SLC7A11	HSPA5	CKB			CHGA		RPL18	DUSP2	STARD10			PHTF2
	TMEM141		PARK7	SORD	HMGB3	FAM111A	RAMP1	CKS1B	FEN1	AL139246.5	ECT2	DYNLL1	SORD	SPON2	ACLY			SYP		PGK1	MYBBP1A	PGAP2			PREX2
	ANKZF1		KRT18	UTRN	PLK1	PPP3CA	EIF1B	SMC2	ZWINT	COX5A	RAD21	HSP90B1	UTRN	LTN1	ABHD2					DDX18	UTP20	PPFIBP2			PRIM2
	HLA-A		HMGCS2	HES4	KIF14	RASSF3	GSTA1	MSH6	CDT1	TCEA1	CDCA8	BIRC5	HES4	AIDA	PLOD2					RPS2	PRMT3	ACSM3			RAB33A
	FADS2		ATP6V1G1	MYO6	ASPM	NRP1		WDHD1	RRM2	MORF4L1	SGO1	GATA2	MYO6	CALR	CCNI					LDHA	FARSA	CRACR2B			RARB
	ERO1A		ADGRV1	TSC22D3	SMC2	RAMP1		ATAD5	SMC1A	PCK2	CCNA2	CENPW	TSC22D3	MT-CO3	SEC61G					RUVBL2	MAP3K6	KCNQ1			RDH10
	ENC1		INSIG2	MME	TACC3	SAT1		TUBA4A	USP1	MRPS35	KIF14	PFKP	MME	MT-ND1	TXNIP					RNPS1	LAS1L	ANO1			RECQL
	PPP2R2A		MLEC	C19orf48	DEK	DEGS1		TYMS	HELLS	RTN3	UBALD2	KTN1	C19orf48	MT-CO1	AK4					EIF2S1	PUS1	CDK19			RGS1
	DDIT4		TMEM144	KLK2	SGO2	TM7SF2		RANBP1	ORC6	FBXO9	KIF2C	KLK4	KLK2	SEC61B	INSIG2					RANBP1	HSPE1	CHCHD10			RGS2
	MXI1		MIA3		PRR11	BDP1		DNAJC9	NASP	FAM177A1	KIF20A	MIF	RPS3A	VAV3	VEGFA					MCM5	SLC29A2	PLPP2			SGOL1
	KLK3		ATP1B1		TROAP	HIST1H1C		CENPM	SIVA1	VEGFA	PIF1	HLA-A	RPL7A	HSP90B1	KLK4					IARS	DCTPP1	CHPT1			SLC31A2
	SOX4		PDIA4		GTSE1	PEG3		DEK	BRCA2	TPD52L1	STMN1	H2AFV	RPS28	PLA2G2A	KLK2					UBE2E1	SUPV3L1	PHLDA1			SLCO2A1
	DEGS1		HOXA10		BUB1	PURA		VRK1	CLSPN	GSTA1	DEPDC1	ERO1A	RPS24	AR	TFF3					MYC	SORD	TSPAN8			SMC2
	MAP1B		ATP11A		SPAG5	GDF15		SRSF2	C21orf58	GNL3	NCAPG	ENAH	RPL41	SEC11C	EGFR					AP3S1	IMP4	RAB11FIP1			STOX1
	SAT1		SMIM14		NMU	PRR34-AS1		NOP56	MYBL2	NDUFB4	PRR11	ANKZF1	NETO1	MID1	DARS					RFC4	GRWD1	CDH1			TIFA
	PGM1		LAMA3		CKAP5	OCLN		H2AFZ	RAD51AP1	SQSTM1	G2E3	FADS1	GULP1	TOX3	MKNK2					DUT	UNG	RHOU			TMEM169
	HPN		ZBTB43		H2AFV	NDUFB4		HSP90AA1	CDCA3	DNPH1	TUBA1B	VKORC1	SLC4A4	WNT5A	PDK1					PSMA4	MPHOSPH10	LGALS3			TMEM241
	SPON2		ITM2B		CEP55	DSC2		TUBA1B	AURKB	ARFGAP3	TMPO	PDK1	RPL23A	BROX	ZKSCAN1					RPS3		CLU			TMEM97
	TMEM123		COX7A2		TUBB	BLOC1S6		CENPX	HMMR	MPHOSPH6	KNSTRN	MIR210HG	COLCA1	MRPL41	TMEM141					SNRPG		KLF5			TMPO
	MYO6		LCP1		UBE2C	GCHFR		TUBB	NDC80	HIST3H2A	PSRC1	ACLY	LUZP2	ANKRD29	ANKZF1					PHB2		MMP7			TRIM36
	GDF15		MRPL20		DEPDC1B	SNRPN		RAD51C	NCAPG	HERPUD1	CEP55	HNRNPA3	RPL4	MANF	HLA-A					SSB		SMCO4			TTK
	TSC22D1		LAMTOR5		TK1	CCND1		ZWINT	HJURP	MB	GPSM2	PLOD2	RLN1	LRRN1	FADS2					EIF4H		BARX2			UCHL5
	HLA-B		P4HB		RPA3	TMED3		RFC1	SGO1	ASS1	H2AFX	KLK2	NAP1L1	CHCHD2	ERO1A					SRSF3		ANXA2			WNT16
	AIDA		MRPL57		TYMS	MYO6		PRKDC	NUF2	PRAC1	PIMREG	EFNA3	LRBA	ADRA2A	ENC1					CCT4		GSTA4			ZBTB10
	AMD1		GUK1		GPSM2	PPFIA2		RPA2	CDCA5	BEX2	CALM2	DARS	NUCB2	NOP10	PPP2R2A					TFDP1		CTSH			ZNF367
	ZFP36L1		TMED2		CKAP2	AIDA		DCTPP1	SPC25	CCPG1	TUBB	EFNA1	CFAP69	FAM198B	DDIT4					EIF2S2		PLSCR1
	IRF6		MTRNR2L12		HNRNPA2B1	MPC2		TUBG1	MND1	NAALADL2	HMGB3	HDGF	ETV1	CREB3L4	MXI1					CDK4		ALAS1
	NETO1		ARRDC3		RAN	DSEL		LSM4	FANCI	KLK3	AURKB	IRF2BP2	IFITM3	MAT2A	KLK3					SNRPD3		ABHD14B
	MIA3		SYT4		SKA2	HMOX1		NCAPD3	BIRC5	RTN4	CDC25B	DDIT4	PLGRKT	NIPSNAP3A	SOX4					PSMD1		LIMK2
	EFNA1		ATG3		KIF20B	TXNRD1		SMC1A	NUDT1	NUCB2	PBK	RAB13	MESP1	CRELD2	DEGS1					RACK1		CLDN7
	FASN		SDF2L1		ZWINT			BRI3BP	ASPM	STEAP1	TTK	MYO6	GTF2H2	TSPAN8	MAP1B					GOT2		ALOX15
	MT1F		TMEM59		TMPO			FUS	GTSE1	GFPT1	CENPW	NEAT1	SLC30A4	H3F3A	SAT1					PABPC4		GDPD1
	PLA2G16		CCT8		CENPA			BARD1	H2AFZ	SCHLAP1	TACC3	DCTN3	METRN	PDIA6	PGM1					CCT5		PRR15L
	VGLL4		COA3		CENPU			RRM2	DLGAP5	SEPHS2	CKAP5	CTNNA1	KLK3	ANK3	HPN					PRPS2		PPP1R1B
	BTG1		CSTB		ARHGAP11A			CKB	PRIM1	SPON2	BUB1	SEL1L	FAM111A	PDIA3	SPON2					ACP1		KRT19
	P4HB		LYPLAL1		AURKA			GMNN	FBXO5	GARS	KIF23	TMSB10	RASSF3	ARPC5	TMEM123					PRPF31		SOX9
	MIR99AHG		FBXO9		HP1BP3			CDK4	RFC4	MAPK6	ARHGAP11A	TSC22D1	NRP1	GTF3C6	MYO6					CCT2		SMIM6
	GLO1		GSTA4		FAM83D			RRM1	CDKN3	PRUNE2	KIF4A	INSIG1	RAMP1	S100A11	GDF15					KARS
	JUND		ARL6IP5		LBR			EMP2	TUBB4B	COMTD1	KNL1	VEGFA	TM7SF2	HSP90AB1	TSC22D1					DEK
	SLC16A1		MYL6		CENPN			NOLC1	ASF1B	ARFGEF3	MAD2L1	IDI1	HIST1H1C	PRUNE2	HLA-B					EIF4G2
	SYT4		ZNF503		LSM5			MRPL17	CENPK	SNRPN	BUB1B	HNRNPR	PRR34-AS1	PARK7	AIDA					XPOT
	AR		SCP2		NCAPG			USP1	NCAPD3	TRPM4	KIF18A	UBC	OCLN	KRT18	AMD1					SRM
	JUN		RAP2B		MRPL51			SMC3	MELK	HSPA9	LBR	SSR1	NDUFB4	HMGCS2	ZFP36L1					UBA2
	MME		CALD1		DTYMK			HIST1H4C	RPA3	CIB1	ANP32E	PIK3R3	DSC2	ATP6V1G1	IRF6					KPNB1
	CAMK2N1		DNAJC3		PCLAF			PCLAF	MCM4	TMED3	RACGAP1	TMEM123	GCHFR	ADGRV1	NETO1					PSMA7
	TMSB10		SELENBP1		DIAPH3				CKLF	PLCB4	SPDL1	EGLN1	SNRPN	INSIG2	MIA3					TRA2B
	LMO4		SSR1		H3F3B				MCM10	NUPR1	ANLN	FASN	CCND1	MLEC	EFNA1					COX5A
	TUBA1A		PPIB		FOXM1				GINS2	ASNS	UBE2T	COX20	PPFIA2	TMEM144	FASN					PA2G4
	ATP1B1		DNPH1		NUDT1				PKMYT1	ARG2	CKAP2L	TFF3	AIDA	MIA3	MT1F					PCBP1
	PLA2G2A		GLO1		PTGES3				CDKN2D	EIF4EBP1	CCNF	FDPS	MPC2	ATP1B1	PLA2G16					HNRNPA1
			DBI		CNIH4				SMC3	AARS	SMC2	ENSA	DSEL	PDIA4	VGLL4					CCNA2
			C1orf122		LSM3				HMGB1	PSAT1	HMGN2	ALDOC	HMOX1	HOXA10	BTG1					PPIA
			RDH11		PARPBP				HIST1H1C	HES4	JPT1	PDIA3	MT1G	ATP11A	P4HB					EIF3J
			MINOS1		NCAPD2				DIAPH3	MYO6	DEPDC1B	IARS2	S100P	SMIM14	MIR99AHG					ORC2
			ATP6V0E1		CCDC34				CBX5	MAOA	NCAPD2	SLC6A8	AC069228.1	LAMA3	GLO1					PSMA2
			MYDGF		RHEB				CDC45	MME	KIF11	HNRNPK	CHCHD10	ZBTB43	JUND					SYNCRIP
			TIMM17A		AL118516.1				DTL	ETV1	CDC25C	H1F0	BLVRB	ITM2B	SLC16A1					HDAC2
			ARFGEF1		CDCA2				CENPE	UAP1	NUCKS1	HMGN1	SYT4	COX7A2	SYT4					LSM2
			AGTRAP		RDM1				KIF2C	CAMK2N1	SAP30	H2AFZ	REXO2	LCP1	AR					VBP1
			ARF4		BUB3				KNL1		H2AFV	ILF2	RNF187	MRPL20	JUN					PSMA6
			MRPL55		NDC80				CHEK1		SAPCD2	BAMBI	NQO1	LAMTOR5	MME					CNBP
			TSC22D1		ANP32B				KIF20B		MIS18BP1	TXNIP	RBCK1	P4HB	CAMK2N1					CDK2
			LAMP2		CBX3				TCF19		H1FX	RPA3	FBXL17	MRPL57	TMSB10					TARDBP
			DDOST		H1FX				RFC2		LMNB1	BDP1	PKIB	GUK1	LMO4					NOLC1
			AP1S1		KPNA2				HIRIP3		KIF22	PRAC2	COX7A2	TMED2	TUBA1A					GSPT1
			DENND1B		CENPM				GMNN		DTYMK	AK4	SARS	MTRNR2L12	ATP1B1					HNRNPA2B1
			ARHGAP29		SAPCD2				WDR34		MXD3	TAX1BP1	FXYD3	ARRDC3	PLA2G2A					ETF1
			ENAH		HNRNPH3				DNAJC9		H2AFZ	PDIA6	PRDX5	SYT4	CCNB1					AC004086.1
			BARD1		SFPQ				EZH2		TROAP	VGLL4	ME1	ATG3	UBE2S					TOMM70
			HERPUD1		LSM4				FANCD2		HP1BP3	KLK3	AIG1	SDF2L1	CENPF					PTGES3
			TMEM14A		RACGAP1				CDCA2		SPAG5	TMEM59	EIF1	TMEM59	CKS2					PSMA1
			GOLIM4		NUDCD2				MNS1		ARHGEF39	XBP1	CLDN7	CCT8	HMMR					PSMC6
			MAP1B		ILF2				DTYMK		GAS2L3	NASP	PHGDH	COA3	CDKN3					CTPS1
					GGH				CDC6		DEK	BZW1	CPNE3	CSTB	TUBA1B					HSPE1
					CACYBP				DSN1		BRD8	ARRDC3	GHITM	LYPLAL1	CDC20					FAM120A
					SPDL1				RFC1		KMT5A	MANF	LINC01133	FBXO9	TUBB4B					PPM1G
					SGO1				MXD3		HMGB1	HSPA5	NARS	GSTA4	BIRC5					HNRNPD
					PTMA				CDCA4		PRC1	TUBA1B	MAP1LC3B	ARL6IP5	HMGB2					SERBP1
					SLTM				CARHSP1		SPC25	SOX4	TRIB3	MYL6	CCNB2					CSTF2
					BCL2L12				HMGN2		FOXM1	JUND	TMED10	ZNF503	TUBA1C					PRDX4
					GGCT				CDCA8		ZWINT	GDF15	MMP16	SCP2	CENPE					EIF4E
					KNSTRN				EMP2		INCENP	ZFP36L1	ZYX	RAP2B	DEPDC1					ODC1
					THUMPD3-AS1				KIF11		DIAPH3		PLA2G16	CALD1	H2AFZ					USP1
					RAD51C				CENPW		RTKN2		DDIT3	DNAJC3	DLGAP5					RPL22
					TXNDC12				PSMC3		SKA2		SCCPDH	SSR1	TOP2A					HNRNPA3
					SNRPB				H1FX		SHCBP1		CLGN	PPIB	PBK					NCBP1
					RBM8A				MCM3		HMG20B		AL139246.5	DNPH1	NUSAP1					RPLP0
					CENPH				E2F1		CENPN		COX5A	GLO1	CKS1B					ABCE1
					HMG20B				CEP55		CCDC18		TCEA1	DBI	TPX2					EIF1AX
					H2AFX				PARP2		NCAPH		MORF4L1	C1orf122	MAD2L1					YWHAE
					LMNB1				POLD3		TK1		PCK2	RDH11	ECT2					MCM7
					TIMM10				ATAD5		ZMYM1		MRPS35	MINOS1	SMC4					YWHAQ
					EMC9				SHCBP1		POC1A		RTN3	ATP6V0E1	NEK2					VDAC1
					CEP70				H2AFV		C21orf58		FBXO9	MYDGF	RAD21					SMARCC1
					PSIP1				FIGNL1		CENPU		FAM177A1	TIMM17A	JPT1					SNRPD2
					SRSF3				LMNB1		KIFC1		VEGFA	ARFGEF1	HMGB1					HNRNPU
					DDX39A				FOXM1		CENPL		TPD52L1	AGTRAP	ANP32E					HDDC2
					KRT10				CCNB2		PARPBP		GSTA1	ARF4	CALM2					PSMD3
					PSAT1				POLQ		CBX5		GNL3	MRPL55	NUCKS1					RRM1
					CBX1				SPC24		RAD51AP1		SQSTM1	TSC22D1	MKI67					SF3A1
					ODC1				LSM4		OIP5		DNPH1	LAMP2	CDCA3					LSM7
					HINT2				PSIP1		MIS18A		ARFGAP3	DDOST	KIF4A					ERH
					UBE2T				CCNA2		WEE1		MPHOSPH6	AP1S1	NUF2					RPL14
					MAL2				TACC3		RNF26		HERPUD1	DENND1B	HMGB3					PSMB3
					RANBP1				RFC5		DCAF7		MB	ARHGAP29	PLK1					IFRD1
					G2E3				SGO2		REEP4		ASS1	ENAH	KIF14					NCBP2
					SRP9				KIF4A		RDM1		BEX2	BARD1	ASPM					GLO1
					MT2A				SPAG5		TYMS		CCPG1	HERPUD1	SMC2					NDUFAB1
					HLTF				CKAP2L		DYNLL1		NAALADL2	TMEM14A	TACC3					CUL1
					CCT5				MAD2L1		CDK5RAP2		RTN4	GOLIM4	DEK					NHP2
					GSPT1				SNRPB		CDKN2D		GFPT1	MAP1B	SGO2					CLNS1A
					HNRNPA3				DBF4		STIL		SCHLAP1	EPHX1	PRR11					TRIM28
					TCEA1				ANLN		RHEB		SEPHS2	SQSTM1	TROAP					RSL1D1
					ATP5IF1				YEATS4		RANGAP1		SPON2	NQO1	GTSE1					HNRNPC
					ISOC2				WDHD1		CIT		GARS	ATF4	BUB1					COPS5
					CKLF				SLBP		SCLT1		MAPK6	HSPD1	SPAG5					XRCC6
					EXOSC8				PSMC3IP		CIP2A		PRUNE2	PCK2	CKAP5					SLC25A3
					2020-09-07				TIMELESS		KIAA0586		COMTD1	APRT	H2AFV					MRPL9
					HNRNPR				BUB1B		KIF15		ARFGEF3	RNF187	CEP55					POLE3
					MTHFD2				GINS1		PCLAF		TRPM4	ATP5F1B	TUBB					POLD2
					NASP				NCAPG2		ARHGAP21		HSPA9	GARS	UBE2C					H2AFZ
					DNAJA1				TUBA4A		SMTN		CIB1	EPRS	DEPDC1B					AIMP2
					SLC3A2				LSM3		CEP70		PLCB4	C2orf54	TK1					NOP56
					HNRNPM				MIS18A		PLEKHA5		ASNS	FTH1	TYMS					PRDX3
					PRAC2				ECT2		UACA		ARG2	GPX4	GPSM2					MRPS18B
					MAT2A				CENPH		RPA3		EIF4EBP1	MGST1	CKAP2					EPRS
					MARCKS				KIF22		MELK		AARS	TARS	RAN					KPNA2
					HSP90AA1				CHAF1A		CCSAP		PSAT1	ARL1	SKA2					HSP90AB1
									SYNE2		CCDC34		UAP1	KLHL35	KIF20B					RPL34
									SNRPG		NUDT1		CAMK2N1	DDIT3	ZWINT					SRPK1
									VRK1		MARCKS			BEX2	TMPO					MAD2L1
									CENPN		RHNO1			PPP1R16A	CENPA					DHX15
									POC1A		CDC27			SDSL	CENPU					MCM4
									MGME1		FBXO5			ASS1	ARHGAP11A					RPS5
									RTKN2		HIST1H4C			ASNS	AURKA					CCT7
									RAD21		MND1			SNHG25	HP1BP3					HDGF
									CCDC34		NUDCD2			TM7SF2	FAM83D					RPS6
									PRKDC		BRCA2			RAMP1	LBR					SNRPB2
									YWHAH		SLC3A2				CENPN					PSMC4
									CKS2		ESCO2				LSM5					CDC20
									MIS18BP1		LSM3				NCAPG					TUFM
									RACGAP1		ORC6				MRPL51					RRP9
									TMEM107		EMC9				DTYMK					CDC45
									BTG3		CBX1				PCLAF					TYMS
									XRCC5		RAD51C				DIAPH3					ILF2
									CEP57		TMEM106C				H3F3B					VDAC3
									HSP90AA1		NCAPG2				FOXM1					IMPDH2
									KPNA2		NMU				NUDT1					SF3B3
									SASS6		IER5L				PTGES3					NOP16
									CENPL		TUBG1				CNIH4					SRSF7
									JUND		CENPM				LSM3					GNL3
									BUB3		PSIP1				PARPBP					EXOSC7
									UBE2S		CENPK				NCAPD2					MRPL23
									XRCC2		DDX39A				CCDC34					RAD23B
									RBBP8		DCP2				RHEB					RPS10
									TUBA1C		C2orf69				AL118516.1					PHB
									GGCT		VRK1				CDCA2					DDX21
									GGH		TXNDC12				RDM1					CYC1
									NCAPD2		CTCF				BUB3					PABPC1
									RPA2		POLQ				NDC80
									NUCKS1		RBM8A				ANP32B
									EBP		FANCI				CBX3
									HNRNPD		BCL2L12				H1FX
									ALYREF		LSM8				KPNA2
									NSD2		MED7				CENPM
									SUZ12		ATAD2				SAPCD2
									TOPBP1		GOT1				HNRNPH3
									LRR1		CKLF				SFPQ
									ANAPC11		CDKN1B				LSM4
									CDK4		EZH2				RACGAP1
									LRRCC1		GGH				NUDCD2
									VPS29		SPC24				ILF2
									CDK5RAP2		USP1				GGH
									COMMD4		DESI2				CACYBP
									CEP78		HIRIP3				SPDL1
									UBC		CDCA5				SGO1
									SUPT16H		YWHAH				PTMA
									EXOSC8		HLTF				SLTM
									SAC3D1		PRPSAP1				BCL2L12
									RBM8A		2020-09-07				GGCT
									DDX39A		HNRNPA2B1				KNSTRN
									SNRPD1		TIMM10				THUMPD3-AS1
									CKAP2		ILF2				RAD51C
									THRAP3		EXOSC8				TXNDC12
									PA2G4		COQ2				SNRPB
									MEA1		MYBL2				RBM8A
									CSE1L		MYEF2				CENPH
									EIF5		CNIH4				HMG20B
									ITGB3BP		CMC2				H2AFX
									HLTF		PCM1				LMNB1
									PGP		CENPH				TIMM10
									TTF2		WSB1				EMC9
									NFATC2IP		TGIF1				CEP70
									CACYBP		ZDHHC12				PSIP1
									TCOF1		MGME1				DDX39A
									TRIR		LSM5				KRT10
									RHEB		SMC1A				PSAT1
									FUS		C9orf40				CBX1
									ZDHHC12		CEP57				ODC1
									RBBP4		PRAC2				HINT2
									SKA2		RRM1				UBE2T
									HAT1		NCAPD3				MAL2
									RMI1		TMEM107				RANBP1
									ACAT2		NSD2				G2E3
									FDPS		ANAPC11				SRP9
									KMT5A		MT2A				HLTF
									LSM8		MTHFD2				CCT5
									SLC3A2		ANP32B				GSPT1
									SRSF7		ITGB3BP				HNRNPA3
									ANP32E		PSMC3				TCEA1
									CEBPG		DCTN3				ATP5IF1
									CCDC14		TPR				ISOC2
									LSM2		TTF2				CKLF
									PHGDH		ZNF714				EXOSC8
									SRSF10		RSRC1				2020-09-07
									RBBP7		GGCT				HNRNPR
									CTCF		SIVA1				MTHFD2
									CMC2		VDAC3				NASP
									H1F0		TCEA1				DNAJA1
									SSRP1		SLTM				SLC3A2
									MTHFD2		RANBP1				PRAC2
									IDH2		WDR34				MAT2A
									HADH		MAL2				MARCKS
									PPM1G		TRIB3				HSP90AA1
									ANP32B		LSM4				FAM111B
									RAD23A		HIST1H1B				PCNA
									CENPX		CEBPG				MCM3
									EIF4EBP1		GMNN				MCM7
									DDIT3		GCLM				MCM4
									CEBPB		DHFR				BRCA1
									TRIB3		LINC01133				ORC6
									MT2A		PSAT1				CLSPN
									HES4		NQO1				GINS2
									DDIT4		ASNS				CDC6
									GDF15		SLC7A11				E2F1
											UQCC2				MCM5
											CEBPB				MCM10
											CALM3				HELLS
											FTH1				SLBP
											HES6				DTL
											EHF				CDT1
											EIF4EBP1				MCM6
															DNMT1
															ATAD2
															FEN1
															CDCA7
															RFC2
															UNG
															CHAF1A
															CDK1
															BRCA2
															DHFR
															XRCC2
															RFC4
															RMI2
															CHEK1
															FIGNL1
															CDC45
															PGP
															ASF1B
															DUT
															MSH6
															WDHD1
															ATAD5
															TUBA4A
															DNAJC9
															VRK1
															SRSF2
															NOP56
															CENPX
															RFC1
															PRKDC
															RPA2
															DCTPP1
															TUBG1
															NCAPD3
															SMC1A
															BRI3BP
															FUS
															BARD1
															RRM2
															GMNN
															CDK4
															RRM1
															EMP2
															NOLC1
															MRPL17
															USP1
															SMC3
															HIST1H4C
															HIST2H2AC
															HIST1H1B
															HIST1H1E
															ESCO2
															TMEM106C
															SIVA1
															C21orf58
															MYBL2
															RAD51AP1
															AURKB
															HJURP
															CDCA5
															SPC25
															MND1
															FANCI
															PRIM1
															FBXO5
															CENPK
															MELK
															PKMYT1
															CDKN2D
															HIST1H1C
															CBX5
															KIF2C
															KNL1
															TCF19
															HIRIP3
															WDR34
															EZH2
															FANCD2
															MNS1
															DSN1
															MXD3
															CDCA4
															CARHSP1
															CDCA8
															KIF11
															PSMC3
															PARP2
															POLD3
															SHCBP1
															POLQ
															SPC24
															CCNA2
															RFC5
															CKAP2L
															DBF4
															ANLN
															YEATS4
															PSMC3IP
															TIMELESS
															BUB1B
															GINS1
															NCAPG2
															MIS18A
															KIF22
															SYNE2
															SNRPG
															POC1A
															MGME1
															RTKN2
															YWHAH
															MIS18BP1
															TMEM107
															BTG3
															XRCC5
															CEP57
															SASS6
															CENPL
															RBBP8
															EBP
															HNRNPD
															ALYREF
															NSD2
															SUZ12
															TOPBP1
															LRR1
															ANAPC11
															LRRCC1
															VPS29
															CDK5RAP2
															COMMD4
															CEP78
															UBC
															SUPT16H
															SAC3D1
															SNRPD1
															THRAP3
															PA2G4
															MEA1
															CSE1L
															EIF5
															ITGB3BP
															TTF2
															NFATC2IP
															TCOF1
															TRIR
															ZDHHC12
															RBBP4
															HAT1
															RMI1
															ACAT2
															FDPS
															KMT5A
															LSM8
															SRSF7
															CEBPG
															CCDC14
															LSM2
															PHGDH
															SRSF10
															RBBP7
															CTCF
															CMC2
															H1F0
															SSRP1
															IDH2
															HADH
															PPM1G
															RAD23A
															EIF4EBP1
															DDIT3
															CEBPB
															TRIB3
															HES4
															UBALD2
															KIF20A
															PIF1
															PSRC1
															PIMREG
															CDC25B
															TTK
															KIF23
															KIF18A
															CCNF
															CDC25C
															SAP30
															ARHGEF39
															GAS2L3
															BRD8
															PRC1
															INCENP
															CCDC18
															NCAPH
															ZMYM1
															KIFC1
															OIP5
															WEE1
															RNF26
															DCAF7
															REEP4
															STIL
															RANGAP1
															CIT
															SCLT1
															CIP2A
															KIAA0586
															KIF15
															ARHGAP21
															SMTN
															PLEKHA5
															UACA
															CCSAP
															RHNO1
															CDC27
															IER5L
															DCP2
															C2orf69
															MED7
															GOT1
															CDKN1B
															DESI2
															PRPSAP1
															COQ2
															MYEF2
															PCM1
															WSB1
															TGIF1
															C9orf40
															DCTN3
															TPR
															ZNF714
															RSRC1
															VDAC3
															GCLM
															LINC01133
															ASNS
															SLC7A11
															UQCC2
															CALM3
															FTH1
															HES6
															EHF
															PTMS
															KIAA2013
															PLOD1
															HSP90B1
															GATA2
															KTN1
															MIF
															ENAH
															FADS1
															VKORC1
															EFNA3
															HDGF
															IRF2BP2
															RAB13
															CTNNA1
															SEL1L
															INSIG1
															IDI1
															SSR1
															PIK3R3
															EGLN1
															COX20
															ENSA
															PDIA3
															IARS2
															SLC6A8
															HNRNPK
															BAMBI
															BDP1
															TAX1BP1
															PDIA6
															TMEM59
															XBP1
															BZW1
															ARRDC3
															MANF
															HSPA5
